# Supplementary material for: Patterns, control and complications of diabetes from a hospital based registry established in a low income country
Source: PubMed Central journal article supplement (PMC5460467; doi:10.1186/s12902-017-0179-1), 2017-06-05
Supplement: 12902_2017_179_MOESM1_ESM.pdf [file 12902_2017_179_MOESM1_ESM.pdf]

|                        |
|------------------------|
| Patient Identification |
|                        |
|                        |
|                        |
|                        |

**Diabetes Progress Sheet**

|      |      |          |      |      |            |      |
|------|------|----------|------|------|------------|------|
| Date | Time | Dr. Name | wt   | Ht   | Pain Score | Sign |
| BP   | mmHg | Pulse    | /min | Resp | /min       | temp |

BMI: \_\_\_\_\_ Hip: \_\_\_\_\_ Waist: \_\_\_\_\_ Allergy: \_\_\_\_\_  
 Age: \_\_\_\_\_ Sex: M F Smoker: Y N Ex Initial / Follow up  
 Diabetes since \_\_\_\_\_ yrs HTN \_\_\_\_\_ yrs Dyslipidemia \_\_\_\_\_ yrs. CAD \_\_\_\_\_ yrs

| Diabetic Medications |      |      | Other Medications   |      |      |
|----------------------|------|------|---------------------|------|------|
| Class                | Type | Dose | Class               | Type | Dose |
| Insulin              |      |      | Statins             |      |      |
|                      |      |      | ACE inhibitors      |      |      |
| Sulfonylurea         |      |      | ARBs                |      |      |
| Metformin            |      |      | Anti platelet       |      |      |
| Glitazones           |      |      | Ezitimibe           |      |      |
| Acarbose             |      |      | Beta Blockers       |      |      |
| others               |      |      | Ca Channel blockers |      |      |
|                      |      |      | Diuretics           |      |      |
|                      |      |      |                     |      |      |
|                      |      |      |                     |      |      |
|                      |      |      |                     |      |      |

**Other Complications / Comorbids:**

Nephropathy  Y  N Diabetic Foot  Y  N HTN  Y  N  
 Dyslipidemia  Y  N S/P Amputation  Y  N CAD  Y  N  
 Depression  Y  N Erectile Dysfunction  Y  N

**Examination:**

Dental hygiene: \_\_\_\_\_  
 Fundoscopy  Y  N Background R  Y  N Proliferative retinopathy  Y  N  
 Foot exam  Y  N Peripheral neuropathy  Y  N Peripheral Vasc. Disesa  Y  N

**Labs:**

GLUF \_\_\_\_\_ GLUR \_\_\_\_\_ HbA1c \_\_\_\_\_ Creat \_\_\_\_\_ Na \_\_\_\_\_ K \_\_\_\_\_ SGPT \_\_\_\_\_  
 T. Cholesterol \_\_\_\_\_ LDL-Cholesterol \_\_\_\_\_ HDL Cholesterol \_\_\_\_\_ Triglycerides \_\_\_\_\_  
 Vit. B12 \_\_\_\_\_ Vit. D \_\_\_\_\_ TSH \_\_\_\_\_ Urine microalbumin \_\_\_\_\_
